# Supplementary material for: The Effects of Cranberry Consumption on Glycemic and Lipid Profiles in Humans: A Systematic Review and Meta-Analysis of Randomized Controlled Trials
Source: MDPI journal article supplement (doi:10.3390/nu16060782), 2024-03-09

| Study or Subgroup                            | Experimental |      |       | Control |      |       | Weight | Mean Difference<br>IV, Random, 95% CI | Year |
|----------------------------------------------|--------------|------|-------|---------|------|-------|--------|---------------------------------------|------|
|                                              | Mean         | SD   | Total | Mean    | SD   | Total |        |                                       |      |
| 2.3.1 dried form (capsules, powder, tablets) |              |      |       |         |      |       |        |                                       |      |
| Lee 2008                                     | -0.4         | 0.39 | 15    | 0.2     | 0.39 | 15    | 12.4%  | -0.60 [-0.88, -0.32]                  | 2008 |
| Hormoznejad 2020                             | 0.09         | 1.13 | 20    | -0.23   | 0.84 | 21    | 4.5%   | 0.32 [-0.29, 0.93]                    | 2020 |
| Shirazi 2021                                 | -0.26        | 0.53 | 46    | -0.21   | 0.51 | 48    | 15.4%  | -0.05 [-0.26, 0.16]                   | 2021 |
| Flanagan 2022                                | -0.3         | 1    | 29    | -0.1    | 1.08 | 31    | 5.7%   | -0.20 [-0.73, 0.33]                   | 2022 |
| Heiss 2022                                   | -0.05        | 0.56 | 22    | 0.04    | 1.53 | 22    | 3.8%   | -0.09 [-0.77, 0.59]                   | 2022 |
| Subtotal (95% CI)                            |              |      | 132   |         |      | 137   | 41.8%  | -0.17 [-0.49, 0.15]                   |      |

Heterogeneity:  $\text{Tau}^2 = 0.08$ ;  $\text{Chi}^2 = 12.72$ ,  $\text{df} = 4$  ( $P = 0.01$ );  $I^2 = 69\%$

Test for overall effect:  $Z = 1.04$  ( $P = 0.30$ )

#### 2.3.2 juice form

|                          |       |      |            |       |      |            |              |                           |      |
|--------------------------|-------|------|------------|-------|------|------------|--------------|---------------------------|------|
| Duthie 2006              | -0.38 | 0.65 | 11         | -0.2  | 0.69 | 9          | 4.8%         | -0.18 [-0.77, 0.41]       | 2006 |
| Basu 2011                | -0.13 | 0.67 | 15         | 0.1   | 0.68 | 16         | 6.6%         | -0.23 [-0.71, 0.25]       | 2011 |
| Dohadwala 2011           | 0     | 0.85 | 22         | -0.03 | 0.89 | 22         | 5.9%         | 0.03 [-0.48, 0.54]        | 2011 |
| Novotny 2015             | 0.1   | 0.51 | 29         | 0.03  | 0.5  | 27         | 13.0%        | 0.07 [-0.19, 0.33]        | 2015 |
| Javid 2017               | 0.08  | 1.39 | 9          | -0.25 | 0.72 | 12         | 1.9%         | 0.33 [-0.67, 1.33]        | 2017 |
| Paquette 2017            | -0.01 | 0.76 | 20         | 0.17  | 0.74 | 21         | 6.9%         | -0.18 [-0.64, 0.28]       | 2017 |
| Richter 2021             | 0     | 0.71 | 40         | -0.08 | 0.71 | 40         | 11.1%        | 0.08 [-0.23, 0.39]        | 2021 |
| Rahn 2023                | -0.03 | 0.5  | 18         | -0.08 | 0.75 | 18         | 7.9%         | 0.05 [-0.37, 0.47]        | 2023 |
| <b>Subtotal (95% CI)</b> |       |      | <b>164</b> |       |      | <b>165</b> | <b>58.2%</b> | <b>0.00 [-0.14, 0.15]</b> |      |

Heterogeneity:  $\text{Tau}^2 = 0.00$ ;  $\text{Chi}^2 = 2.85$ ,  $\text{df} = 7$  ( $P = 0.90$ );  $I^2 = 0\%$

Test for overall effect:  $Z = 0.05$  ( $P = 0.96$ )

**Total (95% CI)** **296** **302** **100.0%** **-0.09 [-0.23, 0.06]**

Heterogeneity:  $\text{Tau}^2 = 0.02$ ;  $\text{Chi}^2 = 19.29$ ,  $\text{df} = 12$  ( $P = 0.08$ );  $I^2 = 38\%$

Test for overall effect:  $Z = 1.19$  ( $P = 0.23$ )

Test for subgroup differences:  $\text{Chi}^2 = 0.94$ ,  $\text{df} = 1$  ( $P = 0.33$ ),  $I^2 = 0\%$

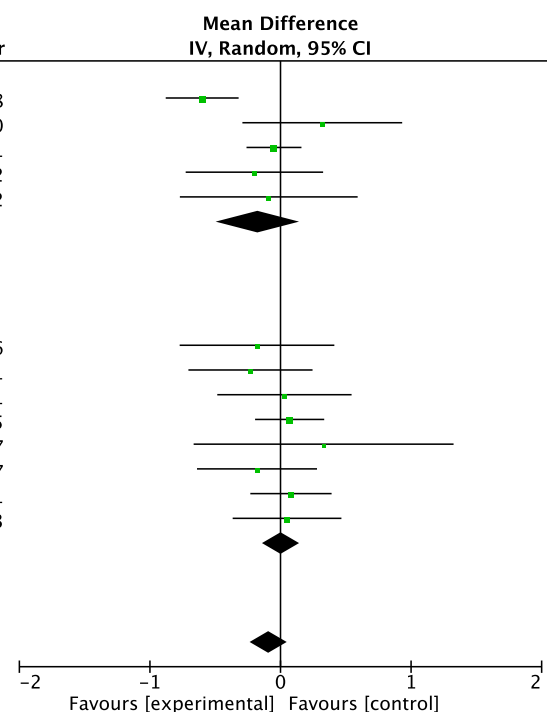

Supplement: s1 [file s1]
