# Supplementary material for: The Effects of Cranberry Consumption on Glycemic and Lipid Profiles in Humans: A Systematic Review and Meta-Analysis of Randomized Controlled Trials
Source: MDPI journal article supplement (doi:10.3390/nu16060782), 2024-03-09

| Study or Subgroup                           | Experimental |      |       | Control |      |       | Weight | Mean Difference<br>IV, Random, 95% CI | Year |
|---------------------------------------------|--------------|------|-------|---------|------|-------|--------|---------------------------------------|------|
|                                             | Mean         | SD   | Total | Mean    | SD   | Total |        |                                       |      |
| 2.1.1 dried form (capsule, powder, tablets) |              |      |       |         |      |       |        |                                       |      |
| Lee 2008                                    | -0.4         | 0.39 | 15    | 0.3     | 0.39 | 15    | 11.3%  | -0.70 [-0.98, -0.42]                  | 2008 |
| Hormoznejad 2020                            | -0.04        | 1.17 | 20    | -0.22   | 0.74 | 21    | 4.4%   | 0.18 [-0.42, 0.78]                    | 2020 |
| Shirazi 2021                                | -0.54        | 1.65 | 46    | -0.13   | 0.32 | 48    | 6.0%   | -0.41 [-0.90, 0.08]                   | 2021 |
| Flanagan 2022                               | -0.2         | 1.15 | 29    | -0.1    | 1.05 | 31    | 4.9%   | -0.10 [-0.66, 0.46]                   | 2022 |
| Heiss 2022                                  | -0.13        | 0.51 | 22    | 0.01    | 1.69 | 22    | 3.1%   | -0.14 [-0.88, 0.60]                   | 2022 |
| Subtotal (95% CI)                           |              |      | 132   |         |      | 137   | 29.7%  | -0.30 [-0.64, 0.05]                   |      |

Heterogeneity:  $\tau^2 = 0.09$ ;  $\chi^2 = 9.47$ ,  $df = 4$  ( $P = 0.05$ );  $I^2 = 58\%$

Test for overall effect:  $Z = 1.70$  ( $P = 0.09$ )

#### 2.1.2 juice form

|                          |       |      |            |       |      |            |              |                            |      |
|--------------------------|-------|------|------------|-------|------|------------|--------------|----------------------------|------|
| Duthie 2006              | -0.01 | 0.65 | 11         | -0.03 | 0.75 | 9          | 4.1%         | 0.02 [-0.60, 0.64]         | 2006 |
| Basu 2011                | -0.14 | 0.85 | 15         | 0.13  | 0.81 | 16         | 4.6%         | -0.27 [-0.86, 0.32]        | 2011 |
| Dohadwala 2011           | -0.05 | 1.02 | 22         | 0     | 1.07 | 22         | 4.2%         | -0.05 [-0.67, 0.57]        | 2011 |
| Flammer 2013             | 0.1   | 0.16 | 32         | 0.14  | 0.18 | 37         | 18.7%        | -0.04 [-0.12, 0.04]        | 2013 |
| Novotny 2015             | 0.08  | 0.61 | 29         | 0     | 0.73 | 27         | 8.9%         | 0.08 [-0.27, 0.43]         | 2015 |
| Javid 2017               | -0.01 | 1.07 | 9          | -0.2  | 0.83 | 12         | 2.5%         | 0.19 [-0.65, 1.03]         | 2017 |
| Paquette 2017            | -0.1  | 0.81 | 20         | 0.08  | 0.97 | 21         | 5.1%         | -0.18 [-0.73, 0.37]        | 2017 |
| Richter 2021             | -0.03 | 0.85 | 40         | -0.03 | 0.85 | 40         | 8.4%         | 0.00 [-0.37, 0.37]         | 2021 |
| Rahn 2023                | -0.01 | 0.24 | 18         | -0.04 | 0.39 | 18         | 13.8%        | 0.03 [-0.18, 0.24]         | 2023 |
| <b>Subtotal (95% CI)</b> |       |      | <b>196</b> |       |      | <b>202</b> | <b>70.3%</b> | <b>-0.03 [-0.10, 0.04]</b> |      |

Heterogeneity:  $\tau^2 = 0.00$ ;  $\chi^2 = 1.99$ ,  $df = 8$  ( $P = 0.98$ );  $I^2 = 0\%$

Test for overall effect:  $Z = 0.83$  ( $P = 0.40$ )

**Total (95% CI)** **328** **339** **100.0%** **-0.12 [-0.26, 0.02]**

Heterogeneity:  $\tau^2 = 0.03$ ;  $\chi^2 = 25.43$ ,  $df = 13$  ( $P = 0.02$ );  $I^2 = 49\%$

Test for overall effect:  $Z = 1.64$  ( $P = 0.10$ )

Test for subgroup differences:  $\chi^2 = 2.24$ ,  $df = 1$  ( $P = 0.13$ ),  $I^2 = 55.4\%$

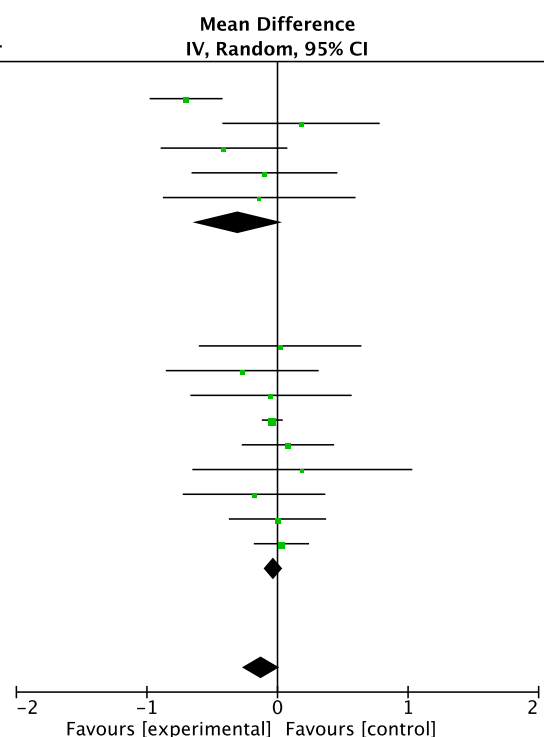

Supplement: s1 [file s1]
