# Supplementary material for: The Effects of Cranberry Consumption on Glycemic and Lipid Profiles in Humans: A Systematic Review and Meta-Analysis of Randomized Controlled Trials
Source: MDPI journal article supplement (doi:10.3390/nu16060782), 2024-03-09
Supplement: s1 [file s1]

Supplementary materials

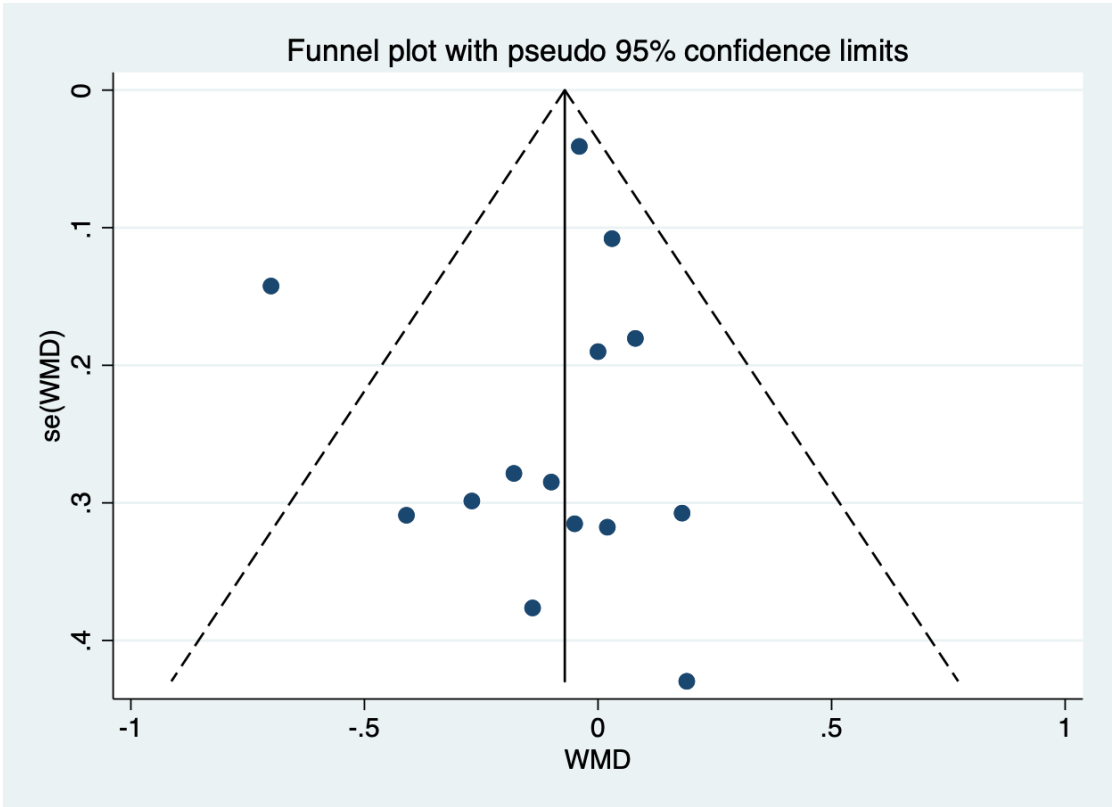

Supplementary Figure 1. Funnel plot to evaluate the publication bias for TC.

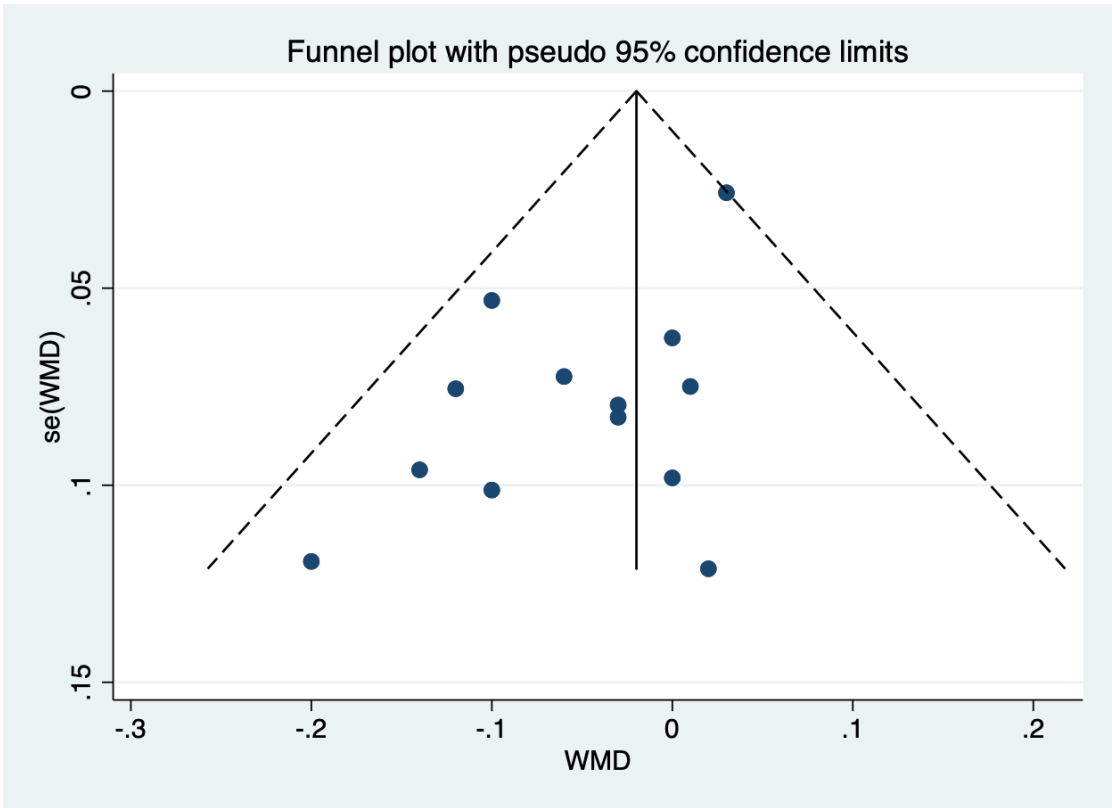

Supplementary Figure 2. Funnel plot to evaluate the publication bias for HDL-C.

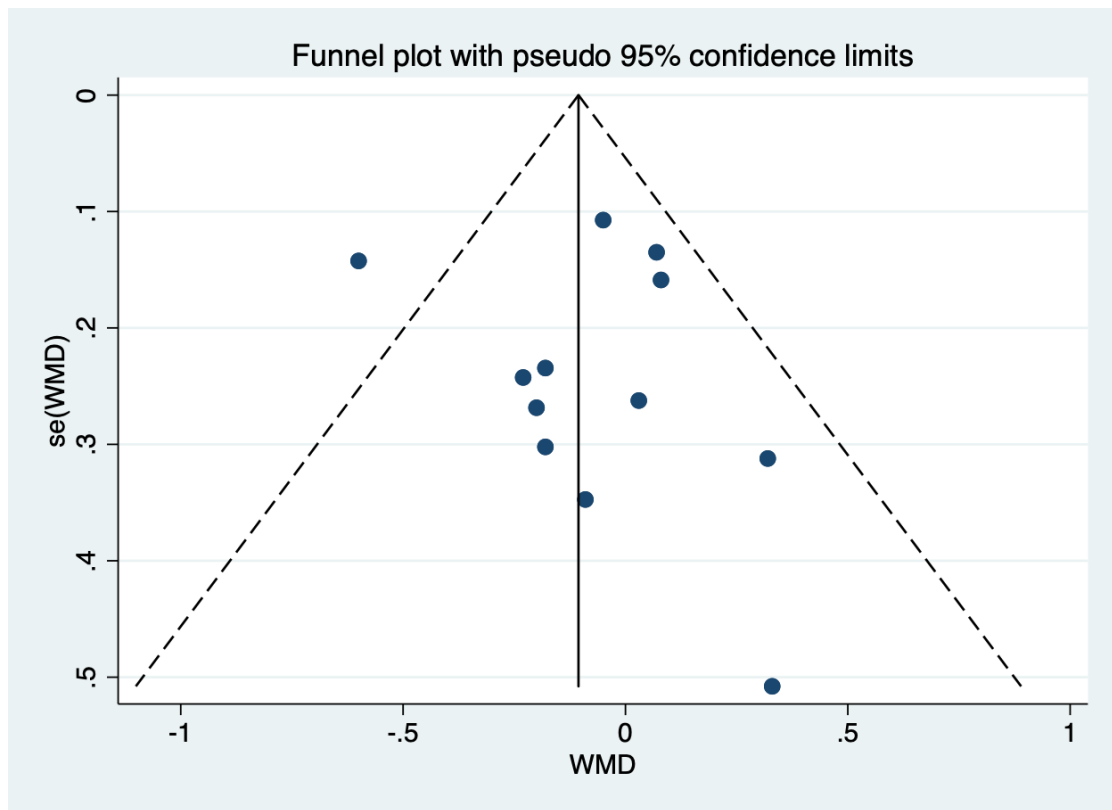

Supplementary Figure 3. Funnel plot to evaluate the publication bias for LDL-C.

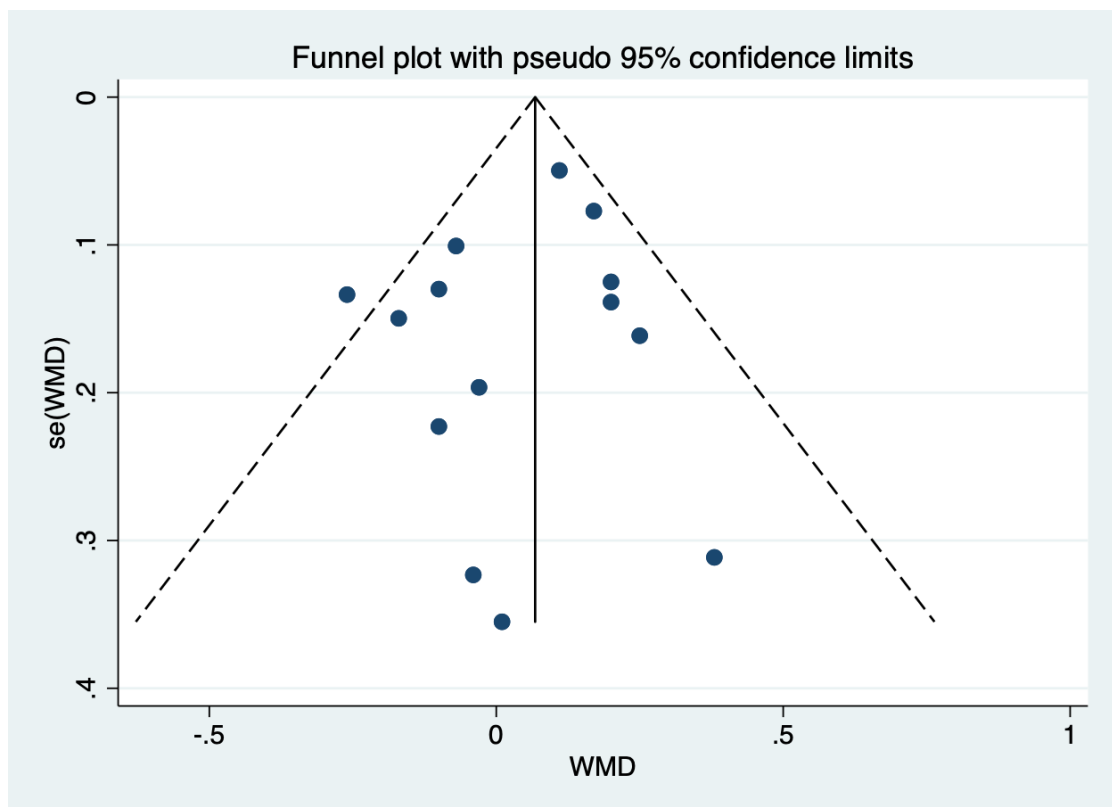

Supplementary Figure 4. Funnel plot to evaluate the publication bias for TG.

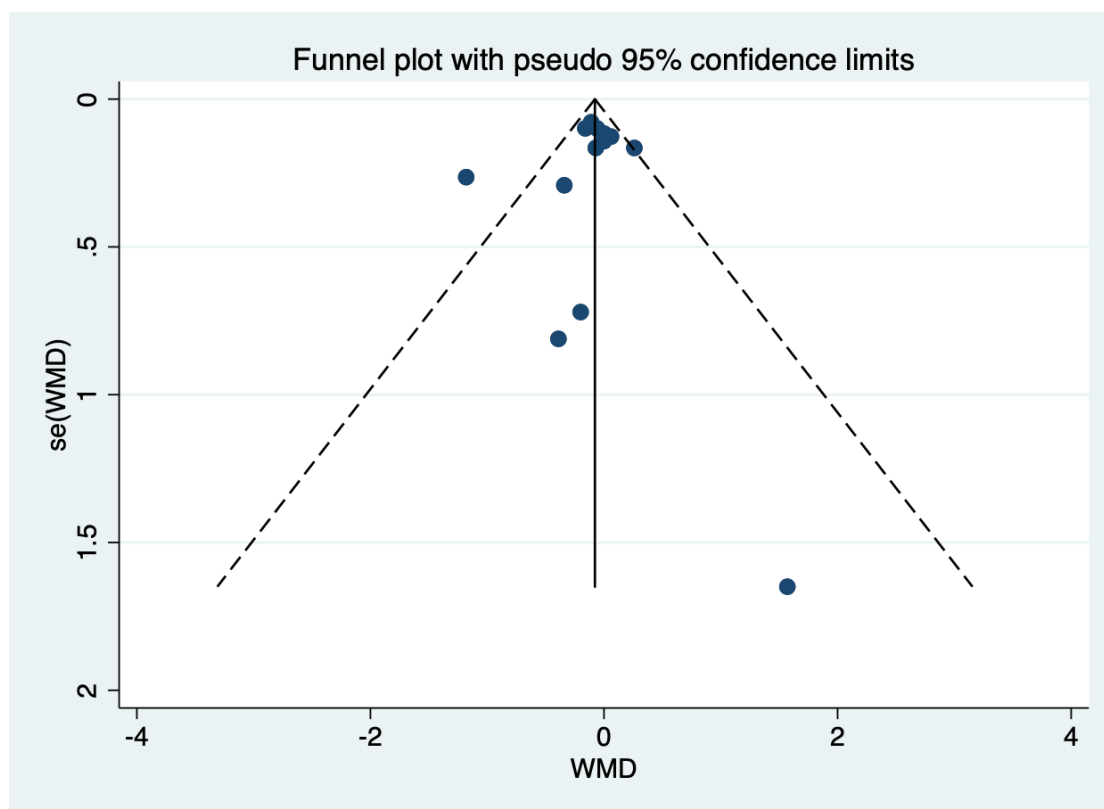

Supplementary Figure 5. Funnel plot to evaluate the publication bias for FBG.

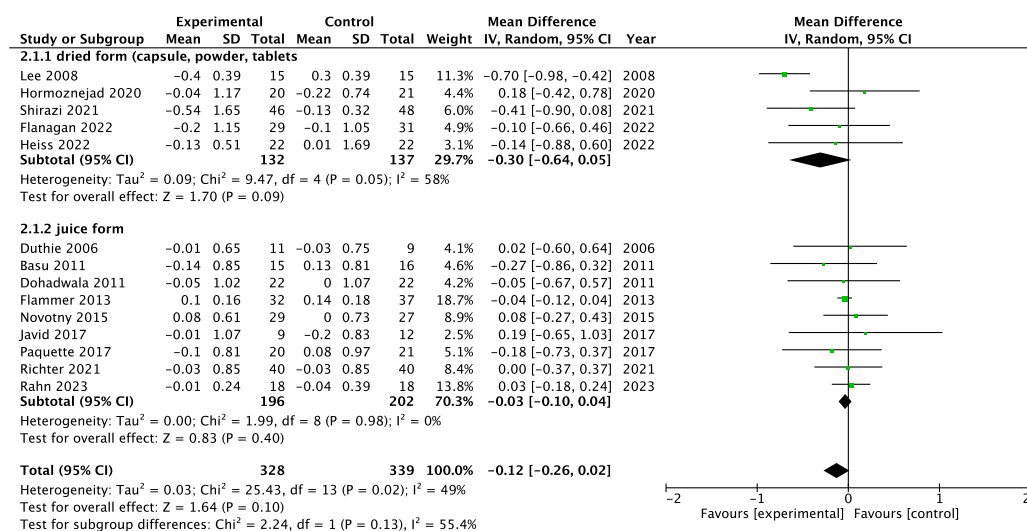

Supplementary Figure 6. Subgroup analysis of the effect of dosage form on TC.

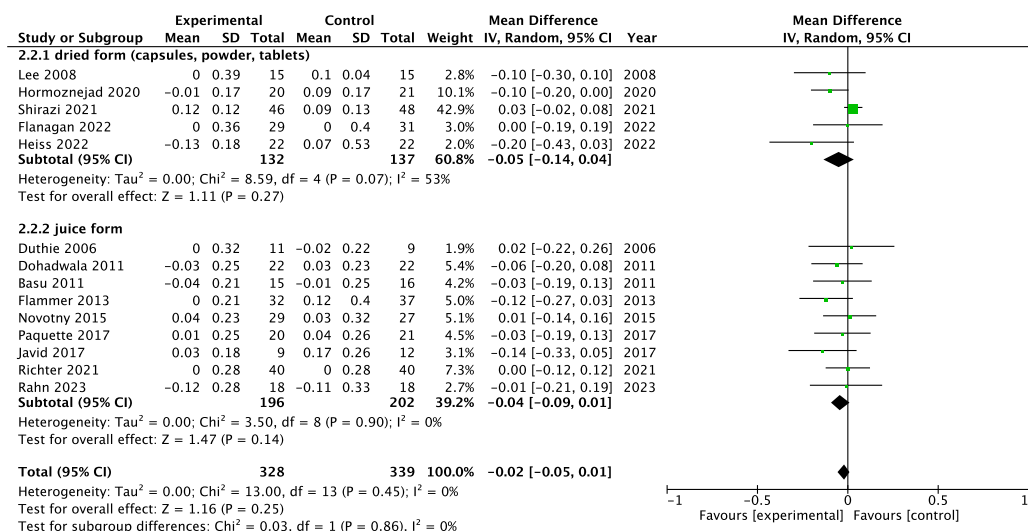

Supplementary Figure 7. Subgroup analysis of the effect of dosage form on HDL-C.

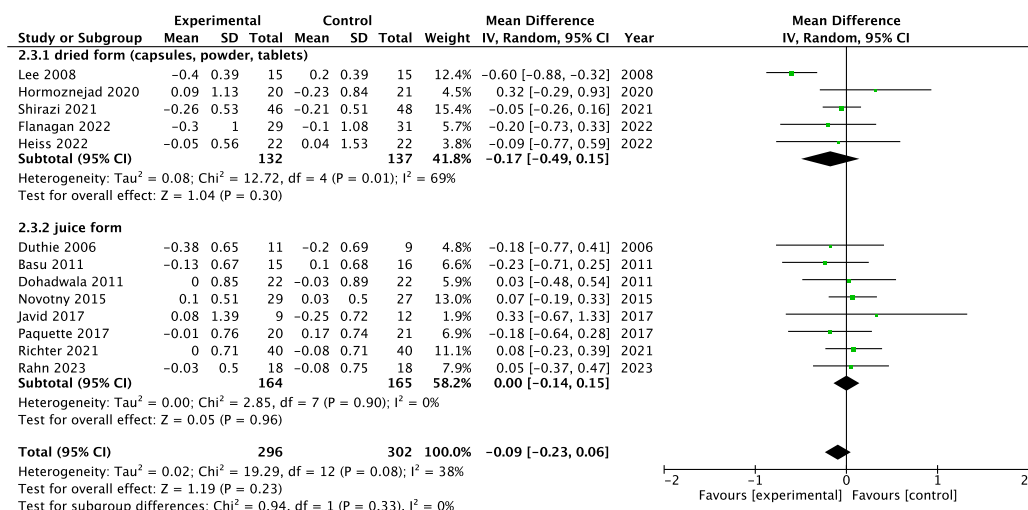

Supplementary Figure 8. Subgroup analysis of the effect of dosage form on LDL-C.

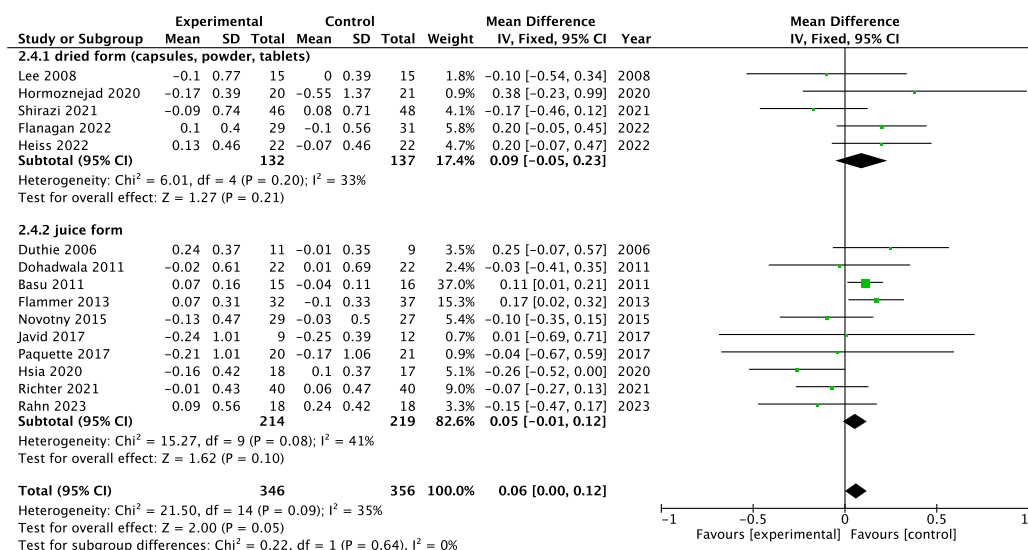

Supplementary Figure 9. Subgroup analysis of the effect of dosage form on TG.



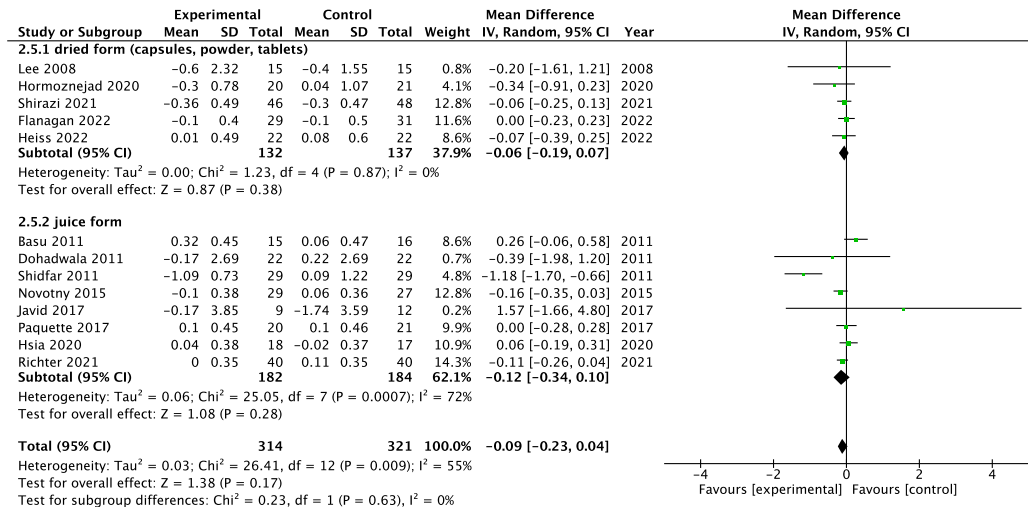

Supplementary Figure 10. Subgroup analysis of the effect of dosage form on FBG.

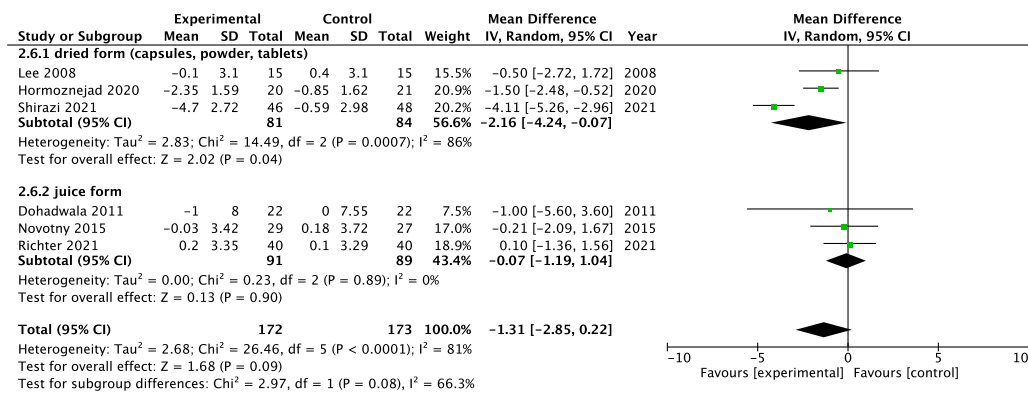

Supplementary Figure 11. Subgroup analysis of the effect of dosage form on fasting insulin.

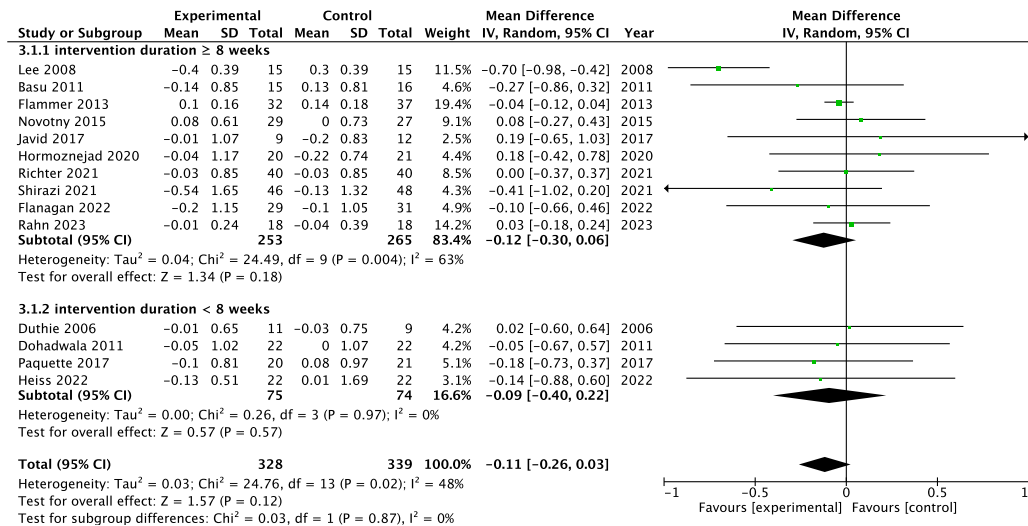

Supplementary Figure 12. Subgroup analysis of the effect of intervention duration on TC.

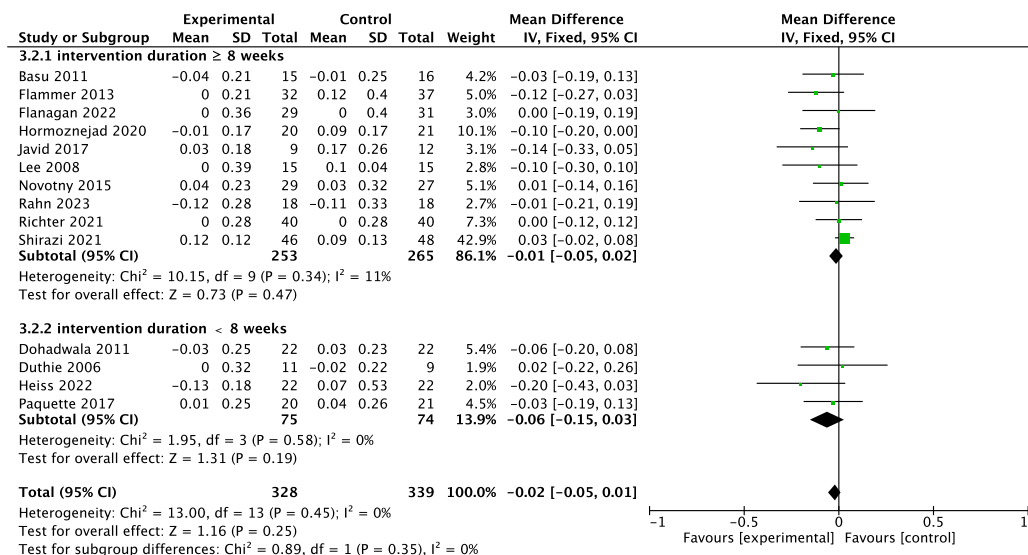

Supplementary Figure 13. Subgroup analysis of the effect of intervention duration on HDL-C.

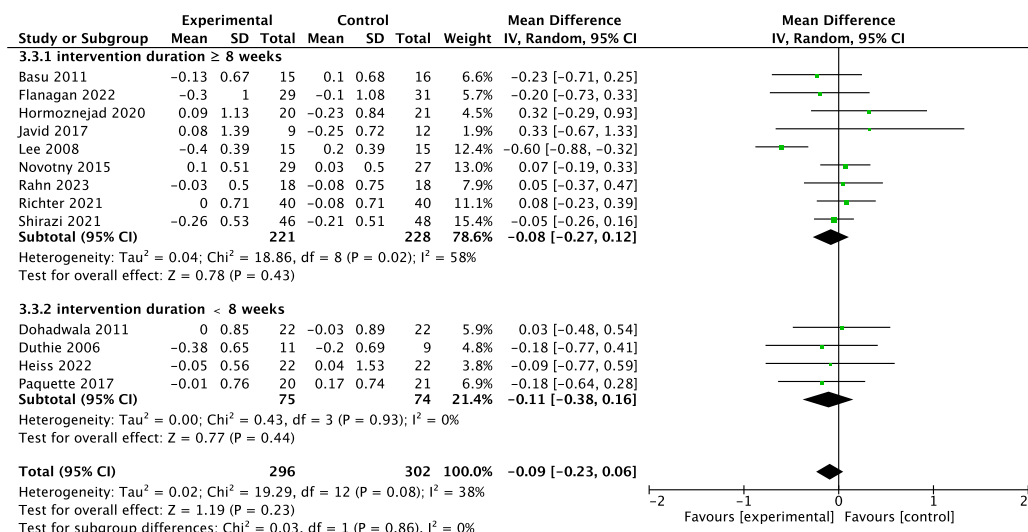

Supplementary Figure 14. Subgroup analysis of the effect of intervention duration on LDL-C.

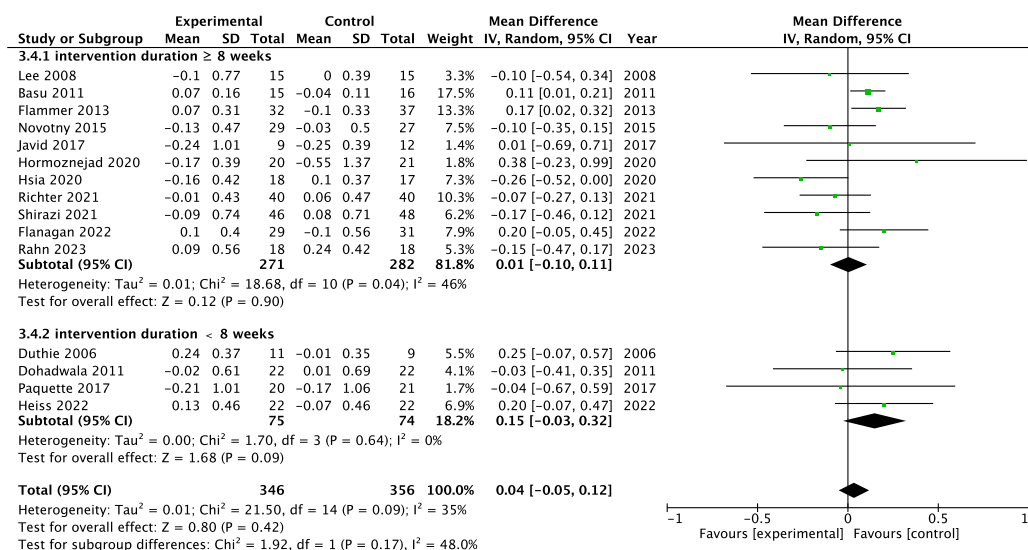

Supplementary Figure 15. Subgroup analysis of the effect of intervention duration on TG.

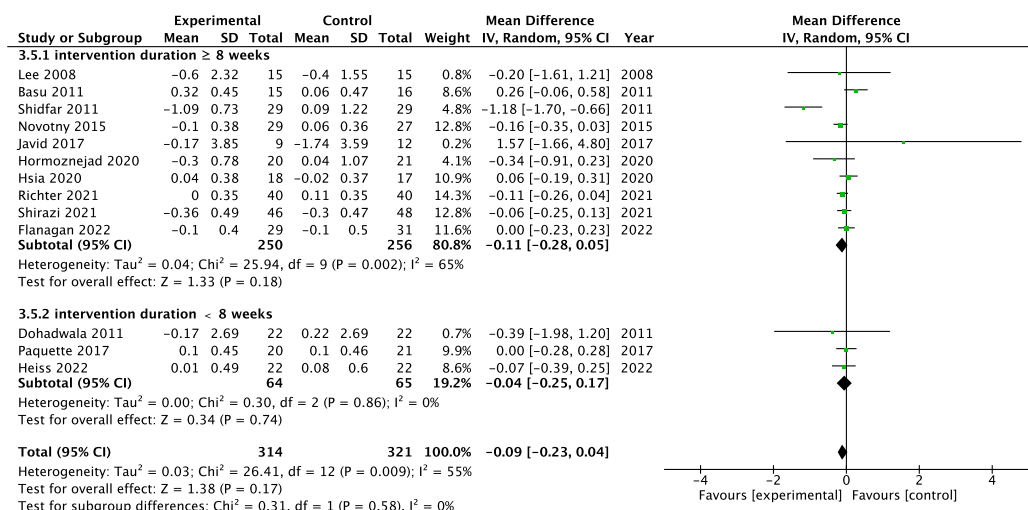

Supplementary Figure 16. Subgroup analysis of the effect of intervention duration on FBG.

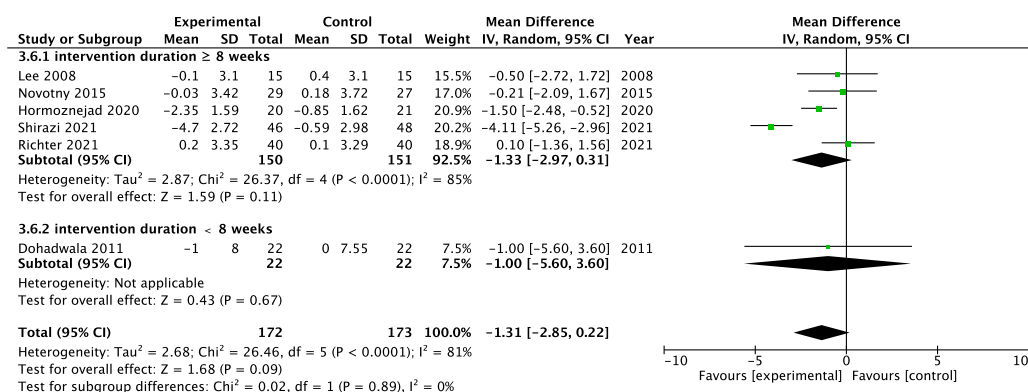

Supplementary Figure 17. Subgroup analysis of the effect of intervention duration on fasting insulin.

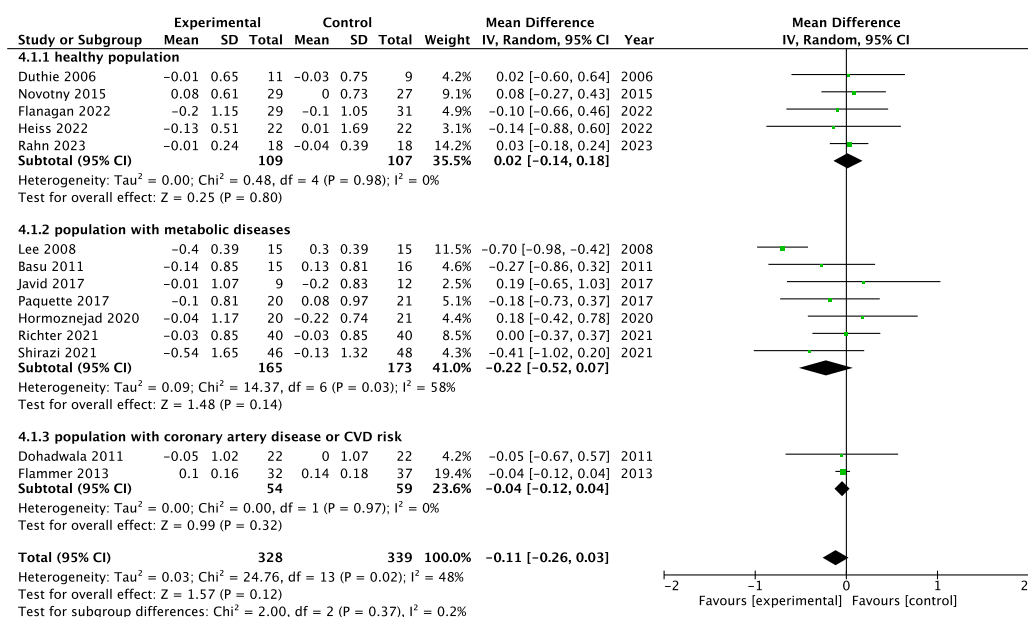

Supplementary Figure 18. Subgroup analysis of the effect of health conditions on TC.

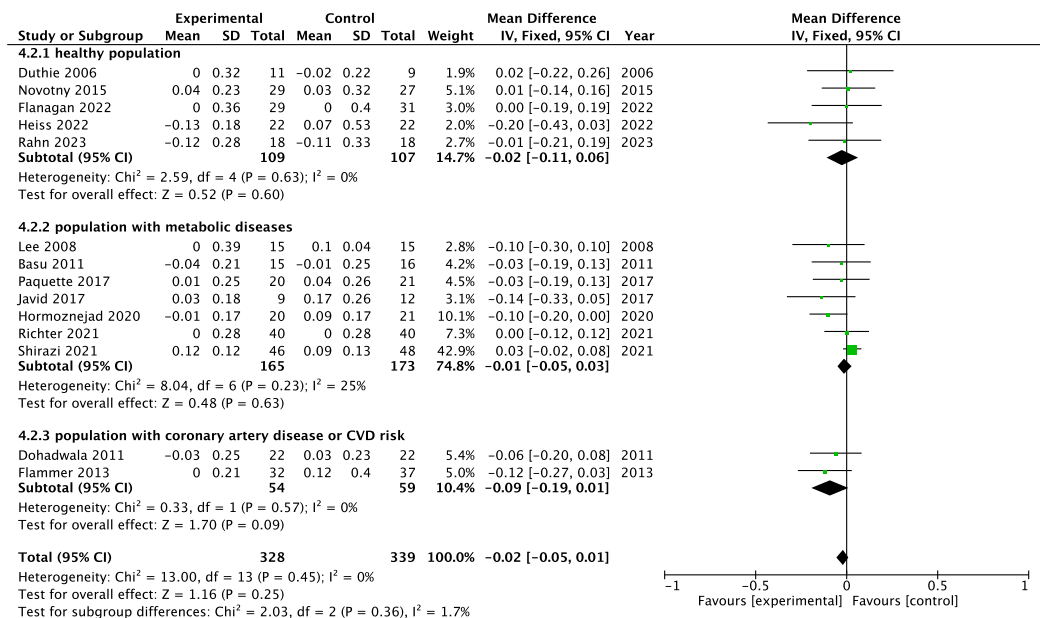

Supplementary Figure 19. Subgroup analysis of the effect of health conditions on HDL-C.

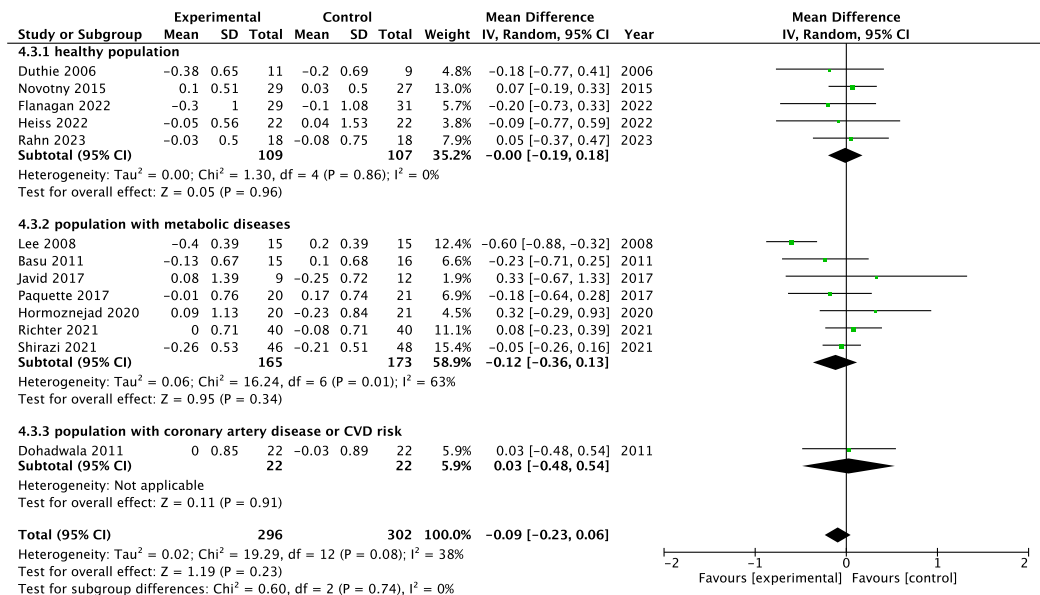

Supplementary Figure 20. Subgroup analysis of the effect of health conditions on LDL-C.

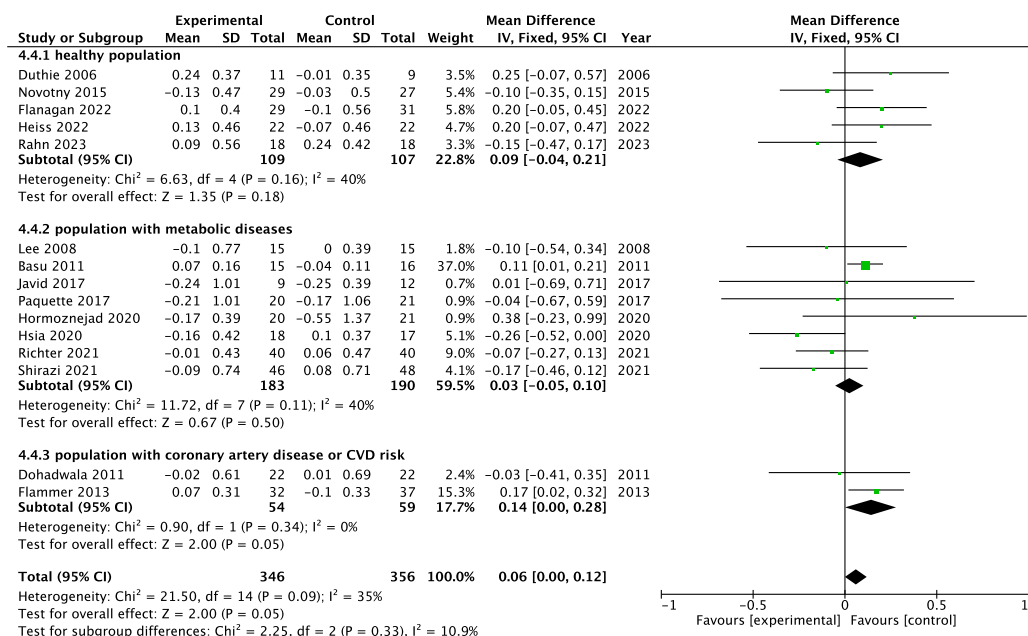

Supplementary Figure 21. Subgroup analysis of the effect of health conditions on TG.

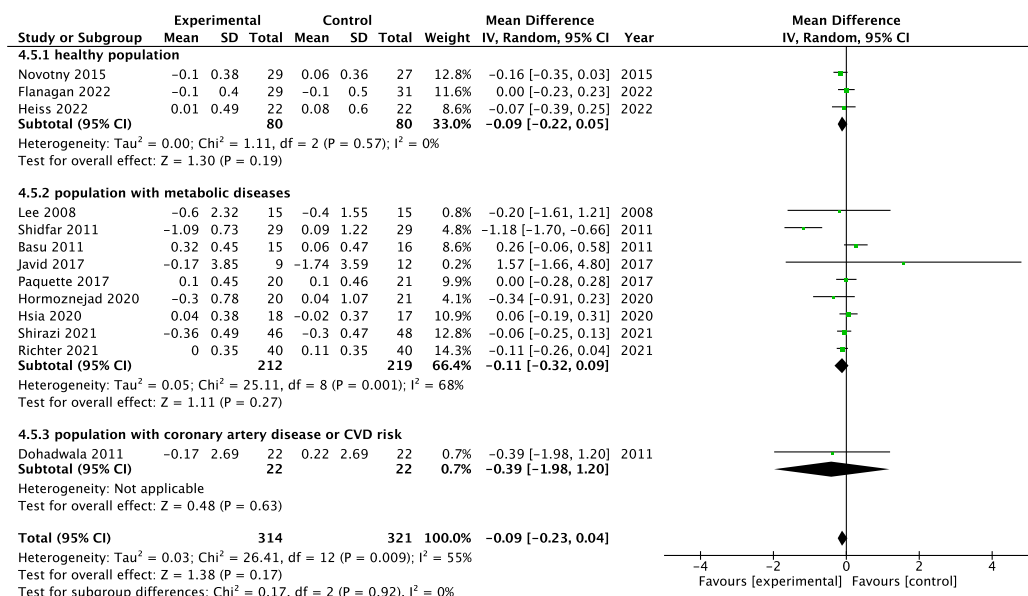

Supplementary Figure 22. Subgroup analysis of the effect of health conditions on FBG.

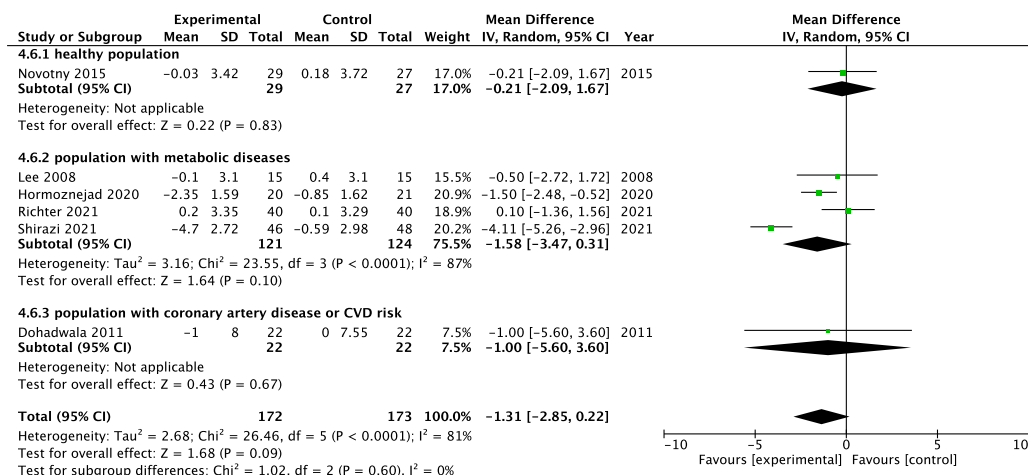

Supplementary Figure 23. Subgroup analysis of the effect of health conditions on fasting insulin.

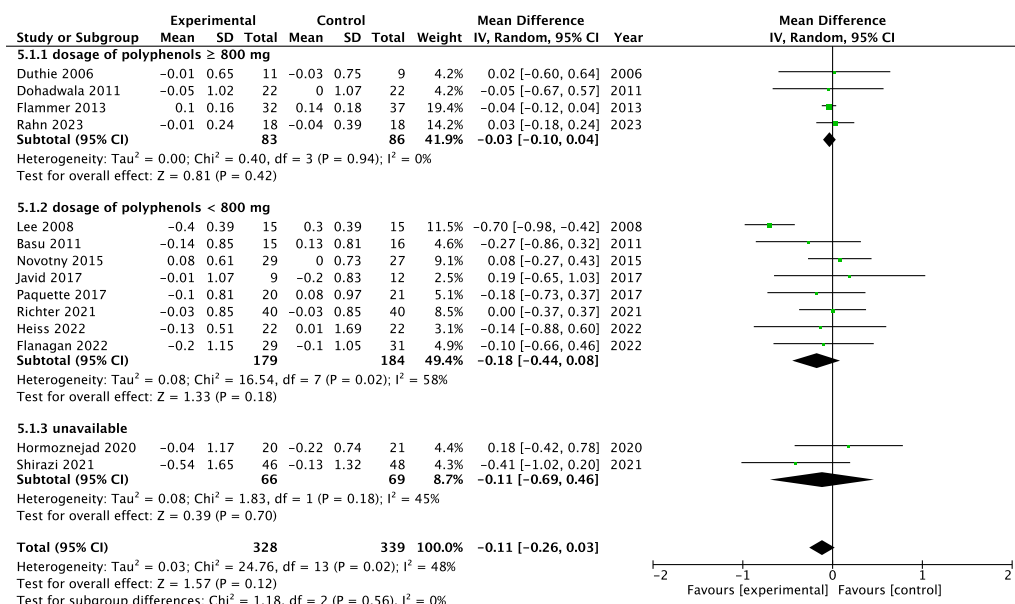

Supplementary Figure 24. Subgroup analysis of the effect of the dosage of total polyphenols on TC.

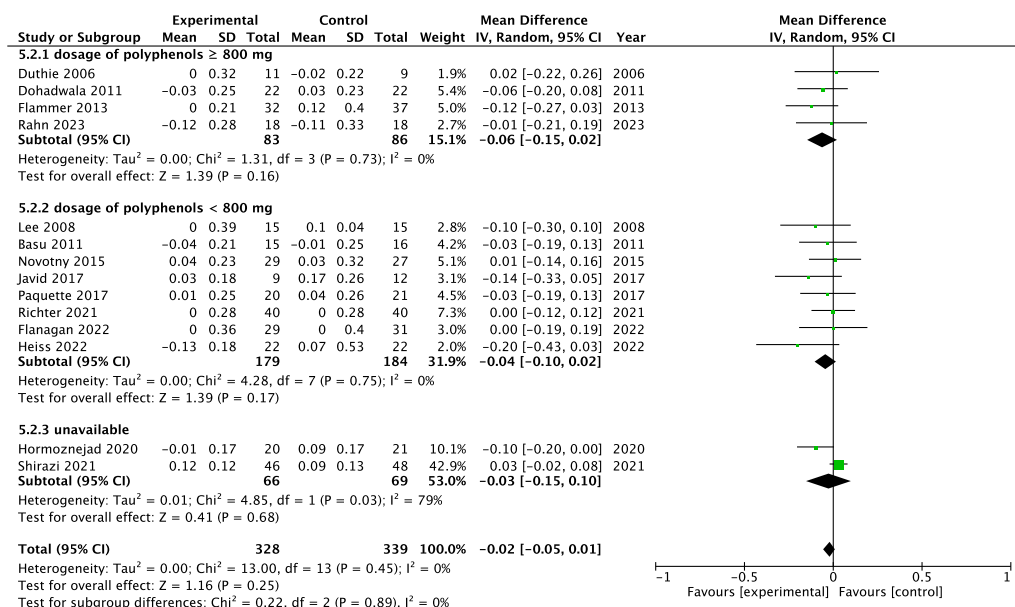

Supplementary Figure 25. Subgroup analysis of the effect of the dosage of total polyphenols on HDL-C.

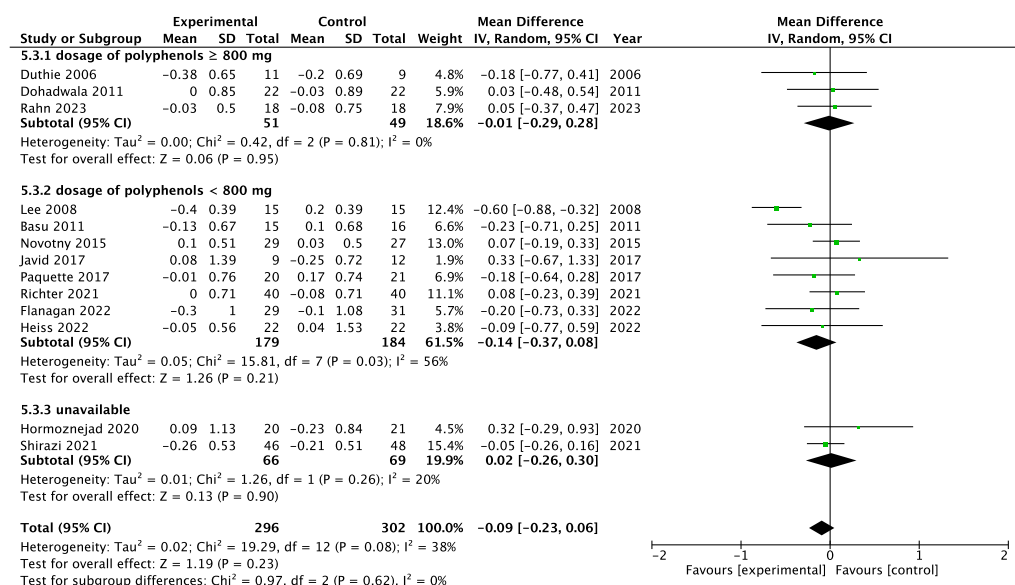

Supplementary Figure 26. Subgroup analysis of the effect of the dosage of total polyphenols on LDL-C.



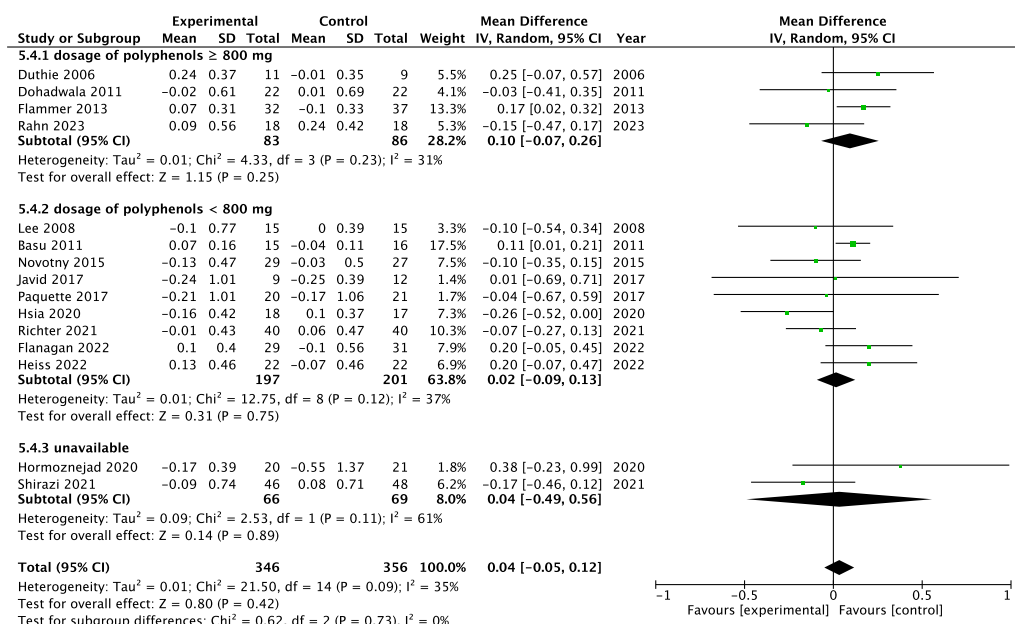

Supplementary Figure 27. Subgroup analysis of the effect of the dosage of total polyphenols on TG.

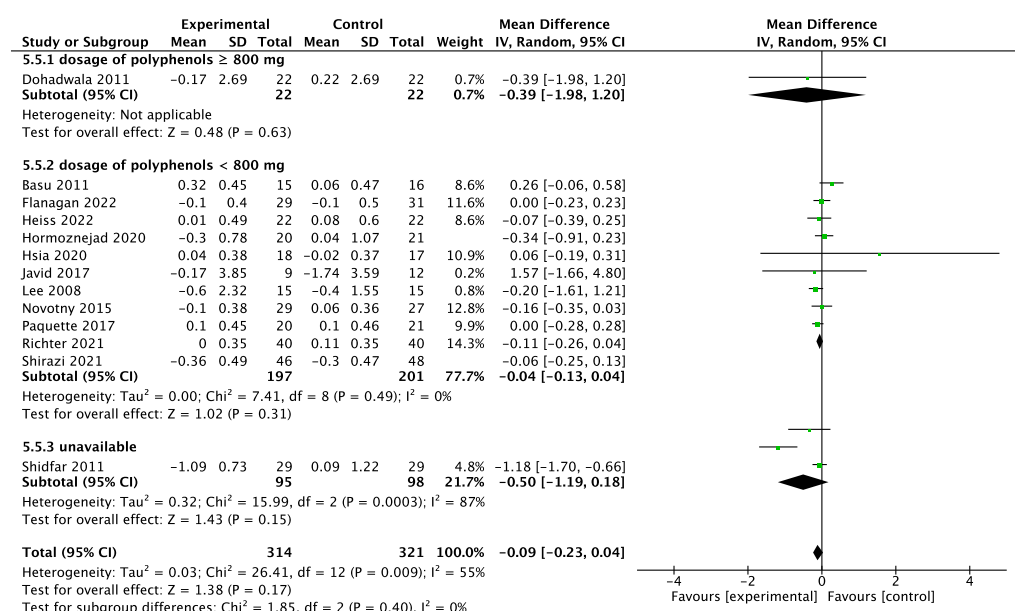

Supplementary Figure 28. Subgroup analysis of the effect of the dosage of total polyphenols on FBG.

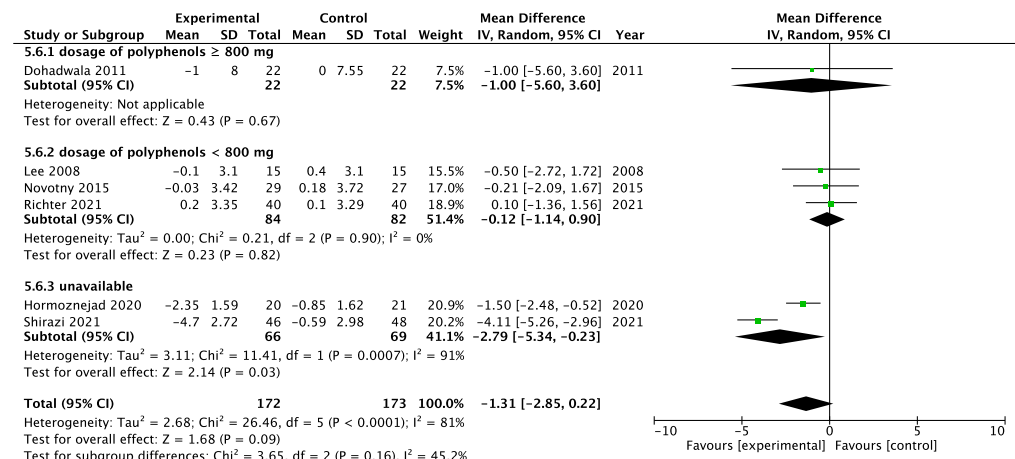

Supplementary Figure 29. Subgroup analysis of the effect of the dosage of total polyphenols on fasting insulin.

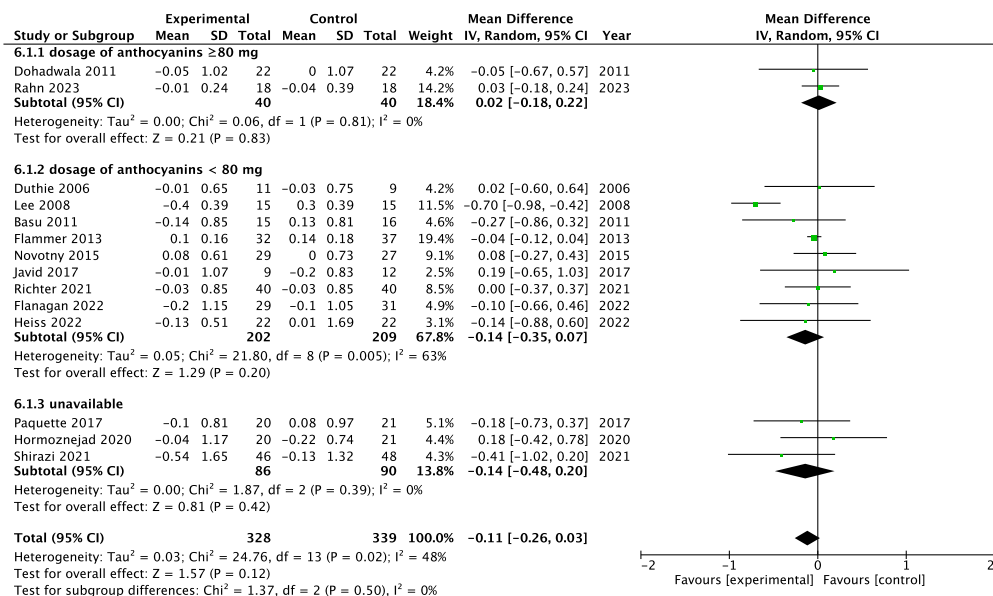

Supplementary Figure 30. Subgroup analysis of the effect of the dosage of anthocyanins on TC.

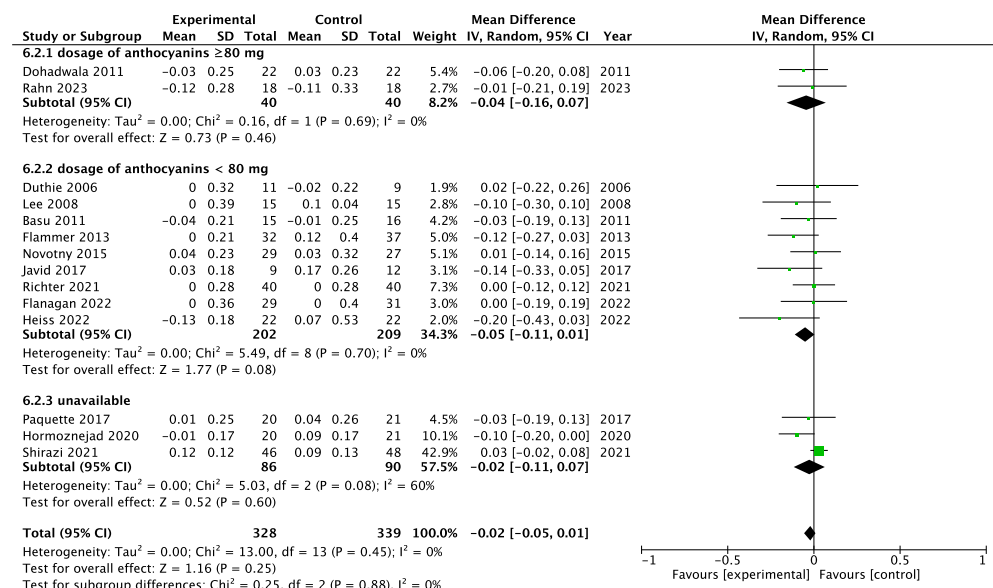

Supplementary Figure 31. Subgroup analysis of the effect of the dosage of anthocyanins on HDL-C.

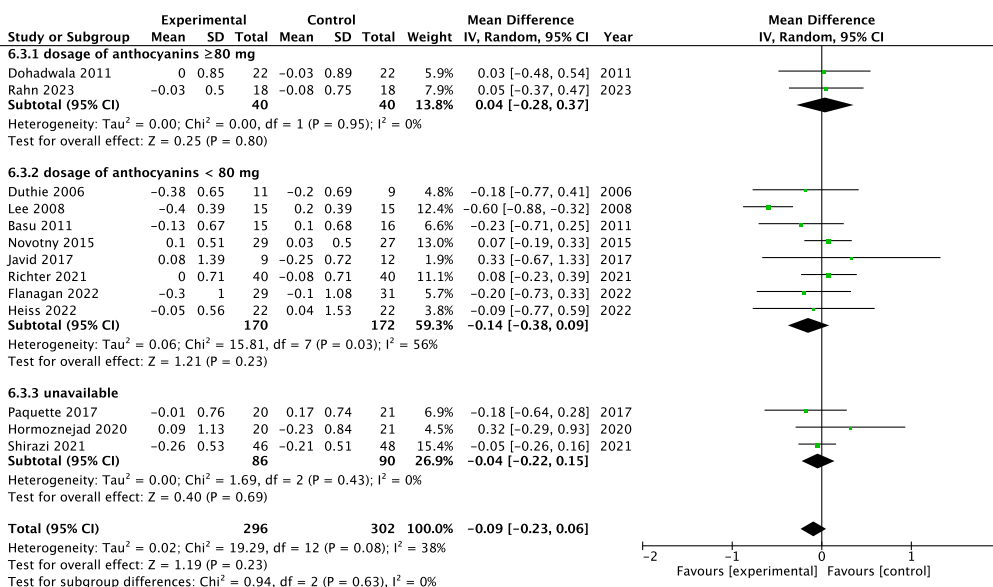

Supplementary Figure 32. Subgroup analysis of the effect of the dosage of anthocyanins on LDL-C.



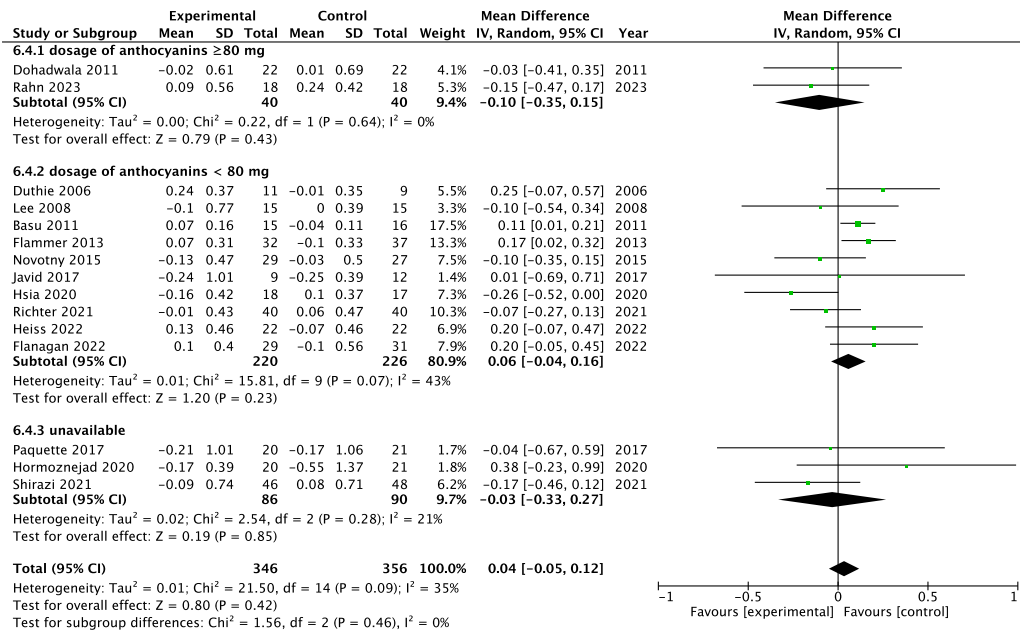

Supplementary Figure 33. Subgroup analysis of the effect of the dosage of anthocyanins on TG.

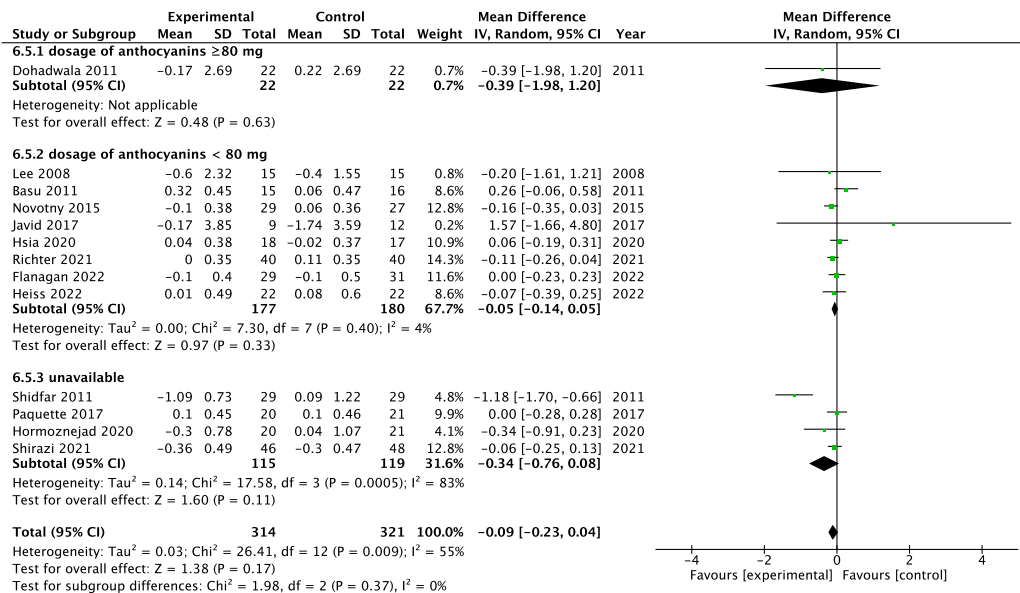

Supplementary Figure 34. Subgroup analysis of the effect of the dosage of anthocyanins on FBG.

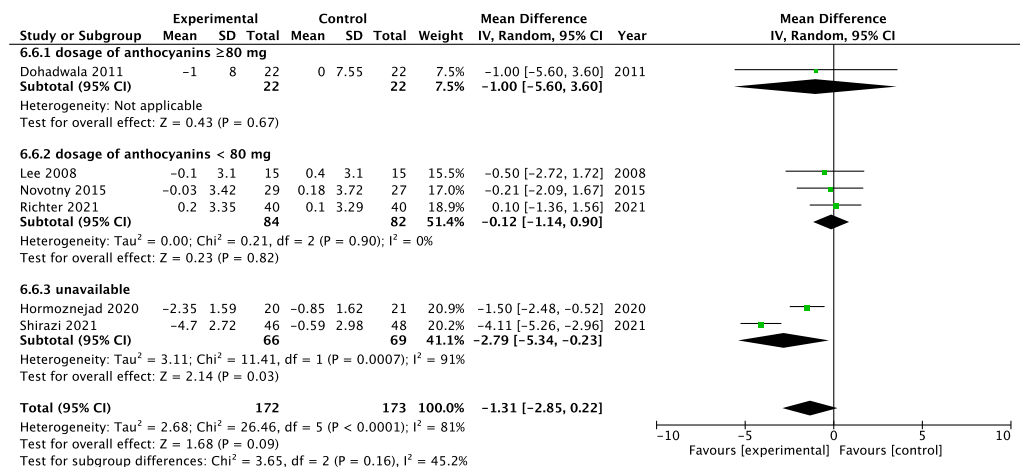

Supplementary Figure 35. Subgroup analysis of the effect of the dosage of anthocyanins on fasting insulin.
